# Supplementary material for: Research on the Interaction Mechanisms between ScCO2 and Low-Rank / High-Rank Coal with ReaxFF-MD Force Field
Source: Preprints.org preprint supplement (doi:10.20944/preprints202405.0822.v1), 2024-05-13
Supplement: Supplementary file 1 [file supplementary]

## Supplementary Materials

### Research on the interaction mechanisms between ScCO<sub>2</sub> and low-rank / high-rank coal with ReaxFF-MD force field

Kui Dong<sup>1</sup> Shaoqi Kong<sup>1,\*</sup> Zhiyu Niu<sup>1</sup> Bingyi Jia<sup>2,3</sup>

<sup>1</sup> College of Mining Engineering, Taiyuan University of Technology, Taiyuan 030024, P. R. China

<sup>2</sup> School of Safety Science and Engineering, Xi'an University of Science and Technology, Xi'an 710000, P. R. China

<sup>3</sup> Xi'an Research Institute of China Coal Technology and Engineering Group Corp, Xi'an 710000, P. R. China

\* Correspondence: [kongshaoqi@tyut.edu.cn](mailto:kongshaoqi@tyut.edu.cn) Tel: +86-13663611856

**Table S1 Proximate and ultimate analyses of coal sample from YZ**

| $R_{o,max}(\%)$ | Proximate analysis (%) |          |           | Ultimate analysis (%) |      |      |      |      |
|-----------------|------------------------|----------|-----------|-----------------------|------|------|------|------|
|                 | $M_{ad}$               | $A_{ad}$ | $V_{daf}$ | C                     | H    | O    | N    | S    |
| 0.62            | 1.92                   | 14.32    | 46.23     | 80.17                 | 5.61 | 8.12 | 1.43 | 4.68 |

**Table S2 Proximate and ultimate analyses of coal sample from CZ**

| $R_{o,max}(\%)$ | Promximate analysis (%) |          |           | Ultimate analysis (%) |      |      |      |      |
|-----------------|-------------------------|----------|-----------|-----------------------|------|------|------|------|
|                 | $M_{ad}$                | $A_{ad}$ | $V_{daf}$ | C                     | H    | O    | N    | S    |
| 3.21            | 0.74                    | 14.76    | 11.3      | 89.22                 | 3.51 | 1.10 | 0.56 | 4.68 |

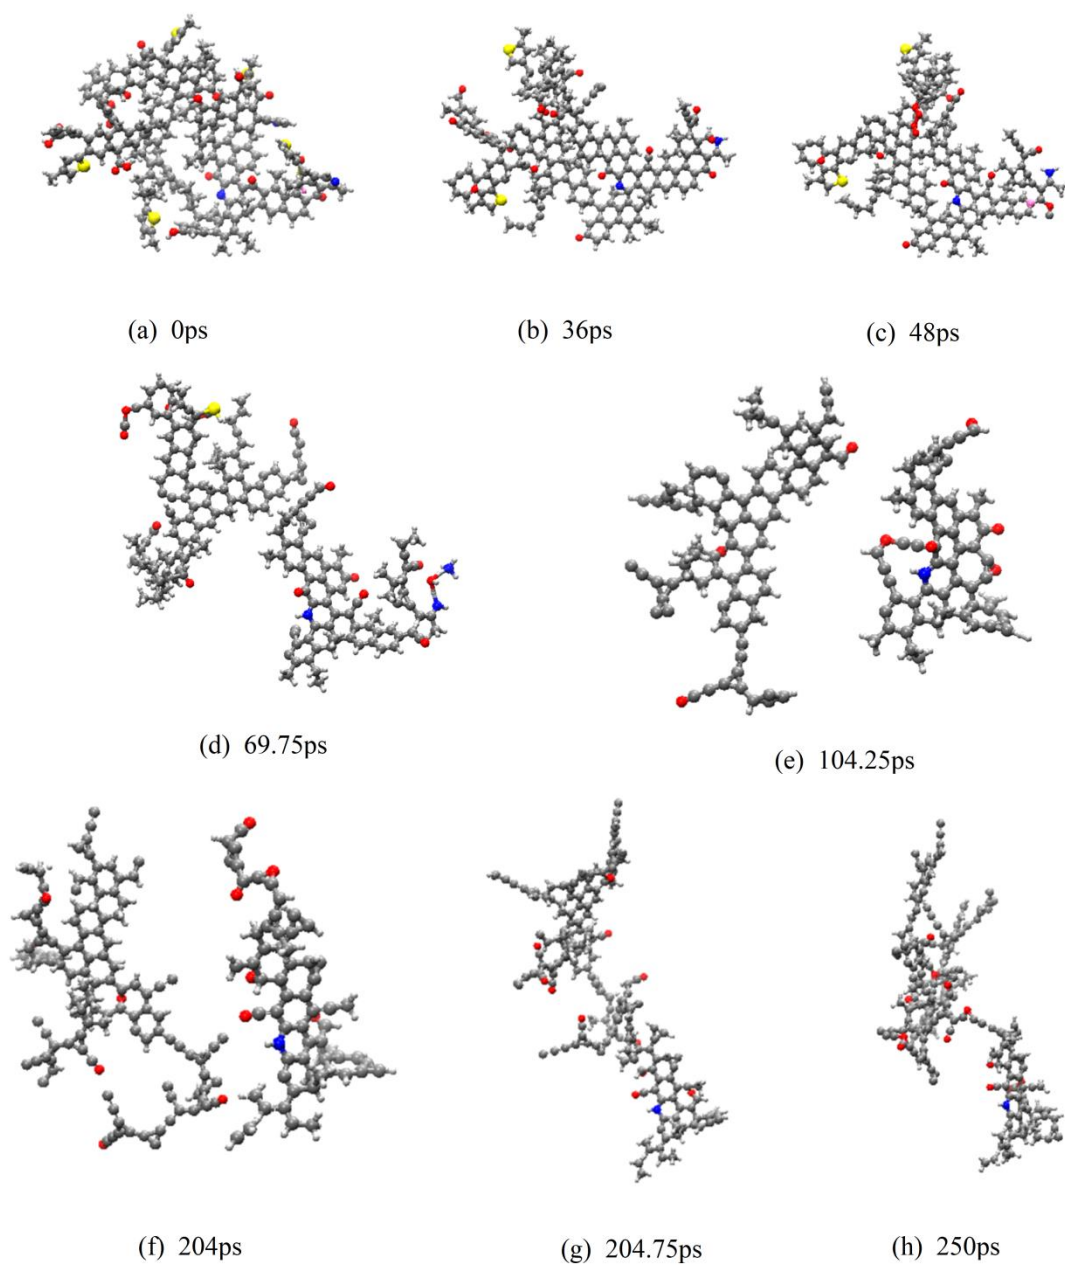

**Figure S1. The low-rank coal macromolecular structures reaction process with ScCO<sub>2</sub>**

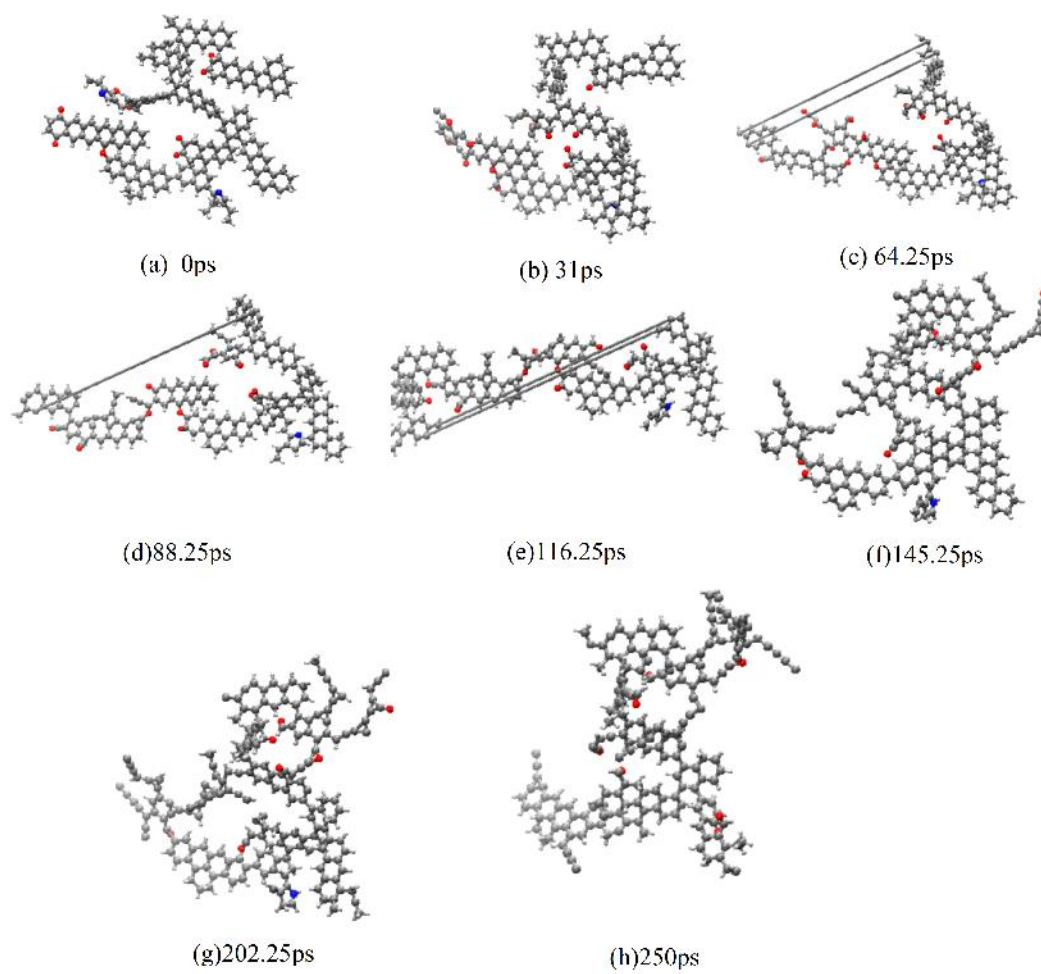

**Figure S2. The high-rank coal macromolecular structures reaction process with ScCO<sub>2</sub>**
